# Supplementary material for: Tuning Liposome Stability in Biological Environments and Intracellular Drug Release Kinetics
Source: Biomolecules. 2022 Dec 27;13(1):59. doi: 10.3390/biom13010059 (PMC9855369; doi:10.3390/biom13010059)
Supplement: Supplementary file 1 [file biomolecules-13-00059-s001.zip]

Archive with 4 entries (3 files):
- biomolecules-2080057-final-supplementary/
- biomolecules-2080057-final-supplementary/Video S1.avi
- biomolecules-2080057-final-supplementary/Video S2.avi
- biomolecules-2080057-final-supplementary/Yang et al. SI-Biomolecules-proofs.pdf
